# Supplementary material for: Pulmonary Embolism in Pregnancy: A Review for Clinical Practitioners
Source: MDPI journal article supplement (doi:10.3390/jcm13102863), 2024-05-13
Supplement: s1 [file s1]

Supplement Table S1. Radiation doses for 256-Slice CTPA.

|                                      | <b>BMI (kg/m<sup>2</sup>)</b> |             |             |             |
|--------------------------------------|-------------------------------|-------------|-------------|-------------|
| <b>Person exposed</b>                | <b>19.7</b>                   | <b>22.9</b> | <b>26.3</b> | <b>30.1</b> |
| <b>Maternal effective dose (mSv)</b> | 1.00                          | 2.05        | 2.24        | 3.43        |
| <b>Embryo/fetal dose (mGy)</b>       | 0.05                          | 0.12        | 0.12        | 0.19        |

BMI - body mass index; CTPA - computed tomographic pulmonary angiography.

Supplement Table S2.

| <b>Section</b>         | <b>Take Home Message</b>                                                                                                                                                                                                                                                                                                                                                                                                                                                                                                                                                                                                                                                                                                                                                                              |
|------------------------|-------------------------------------------------------------------------------------------------------------------------------------------------------------------------------------------------------------------------------------------------------------------------------------------------------------------------------------------------------------------------------------------------------------------------------------------------------------------------------------------------------------------------------------------------------------------------------------------------------------------------------------------------------------------------------------------------------------------------------------------------------------------------------------------------------|
| Clinical Presentation  | ✓ PAG score can estimate the prevalence of PE in specific risk groups of pregnant patients.                                                                                                                                                                                                                                                                                                                                                                                                                                                                                                                                                                                                                                                                                                           |
| Laboratory Test Values | ✓ D-dimer <u>alone</u> to exclude PE does not provide sufficient negative predictive value in pregnancy. Use d-dimer measurement according to YEARS algorithm.                                                                                                                                                                                                                                                                                                                                                                                                                                                                                                                                                                                                                                        |
| Electrocardiogram      | ✓ ECG has low sensitivity as a diagnostic test for PE                                                                                                                                                                                                                                                                                                                                                                                                                                                                                                                                                                                                                                                                                                                                                 |
| Imaging                | <ul style="list-style-type: none"> <li>✓ Chest radiography may rule out non-PE-related diagnoses such as pneumothorax or pneumonia</li> <li>✓ Echocardiography in hemodynamically unstable patients supports the clinical diagnosis</li> <li>✓ CUS should be interpreted with the inclusion of C-PTP</li> <li>✓ CTPA and perfusion scintigraphy are suitable for ruling out PE during pregnancy</li> <li>✓ Non-contrast magnetic resonance angiography (MRA) has shown potential in the diagnostics of PE in pregnant patients. Additional studies are needed.</li> <li>✓ Perfusion scanning produces lower effective doses to the breast and fetus than CTPA</li> <li>✓ Lung ultrasonography LUS may detect peripheral lesions in PE. Currently, it is considered an experimental method.</li> </ul> |
| Therapy                | <ul style="list-style-type: none"> <li>✓ Anticoagulation with LMWH should be monitored with anti-factor Xa (target values: 0.5–0.80 IU/mL)</li> <li>✓ Thrombolytic therapy should only be used in hemodynamically unstable patients (high-risk pulmonary embolism)</li> <li>✓ There are no prospective randomized studies on catheter-guided therapy, surgical thrombectomy, and extracorporeal membrane oxygenation in pregnant women. CDT is intended for high-risk patients in whom thrombolysis or appropriately dosed anticoagulation has either failed or is contraindicated</li> <li>✓ Surgical thrombectomy should be evaluated in cases where anticoagulation is ineffective, or the patient is hemodynamically unstable</li> </ul>                                                          |

PAG score - The Pregnancy-Adapted Geneva score; PE – pulmonary embolism; ECG – electrocardiogram; CUS - compression ultrasonography; C-PTP - clinical pretest probability; CTPA - computed tomographic pulmonary angiography; V/Q - ventilation-perfusion; CDT - Catheter-directed therapy; LUS – lung ultrasonography.
